# Supplementary material for: Single-conformation spectroscopy of cold, protonated DPG-containing peptides: switching β-turn types and formation of a sequential type II/II′ double β-turn
Source: Royal Society of Chemistry journal article supplement (doi:10.1039/d1cp04852j), 2022-01-01
Supplement: d1cp04852j1.pdf [file d1cp04852j1.pdf]

SUPPORTING INFORMATION

**Single-Conformation Spectroscopy of Cold, Protonated  $^{\text{D}}$ PG-containing peptides: Switching  $\beta$ -turn Types and Formation of a sequential Type II/II' Double  $\beta$ -turn**

John T. Lawler<sup>a</sup>, Christopher P. Harrilal<sup>a,‡</sup>, Andrew F. DeBlase<sup>a,†</sup>,

Edwin L. Sibert III<sup>b,\*</sup>, Scott A. McLuckey<sup>a,\*</sup>, and Timothy S. Zwier<sup>a,c,\*</sup>

<sup>a</sup>*Department of Chemistry, Purdue University, West Lafayette, Indiana 47907-2084 USA*

<sup>b</sup>*Department of Chemistry, University of Wisconsin-Madison, Madison, WI 53706 USA*

<sup>c</sup>*Gas Phase Chemical Physics, Sandia National Laboratories, Livermore, CA 94550 USA*

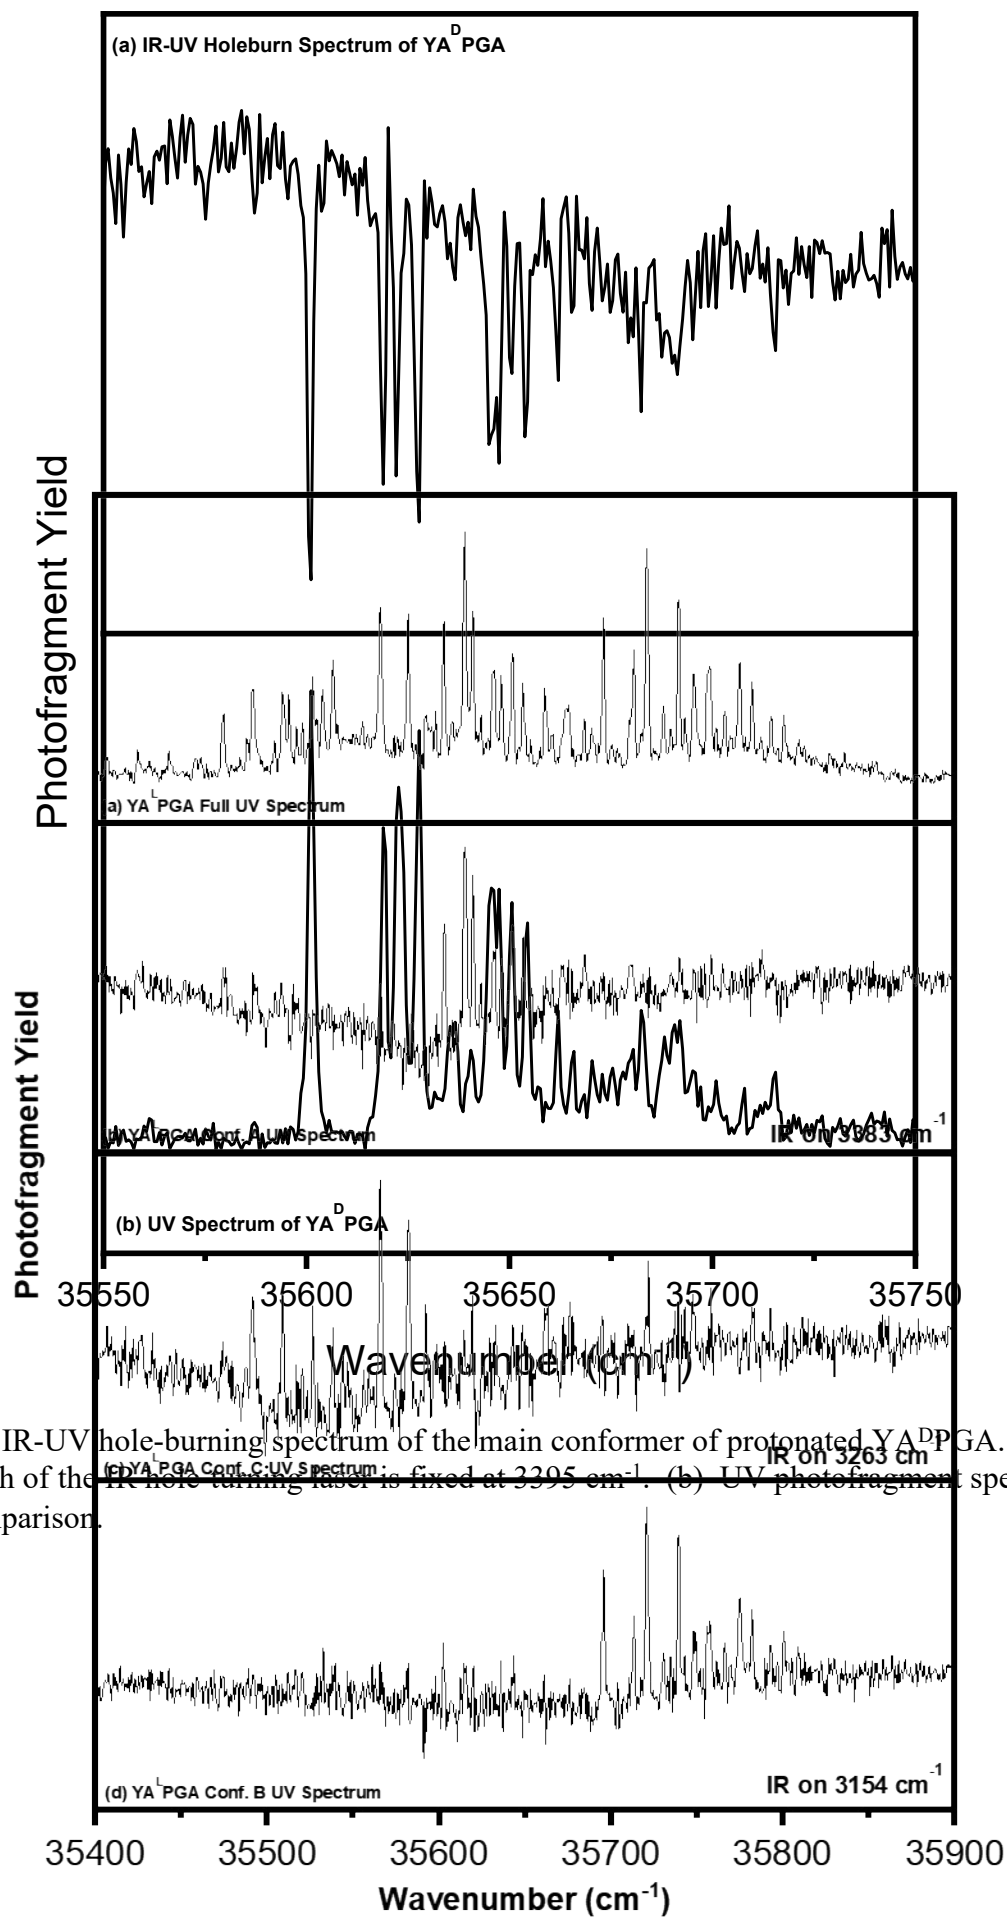

**Figure S1.** (a) IR-UV hole-burning spectrum of the main conformer of protonated YADPGA. The wavelength of the IR hole burning laser is fixed at 3395 nm. (b) UV photofragment spectrum shown for comparison.

**Figure S2.** (a) UV photofragment spectrum of protonated  $\text{YA}^{\text{L}}\text{PGA}$ . IR-UV hole-burning spectra of conformers (b) A, (c) B, and (d) C, with IR hole-burn laser fixed at the indicated wavenumber position. These spectra prove that there are three unique conformers of  $[\text{YA}^{\text{L}}\text{PGA}+\text{H}]^+$ .

| Type II,<br>A <sup>DP</sup> | 0.00 | 0.00 |
|-----------------------------|------|------|
| Type II'<br><sup>DP</sup> X | 14.3 | 0.54 |

Table S1. Zero-point corrected relative energies ( $\Delta E_0$ ) for the secondary structural motifs of each molecule.

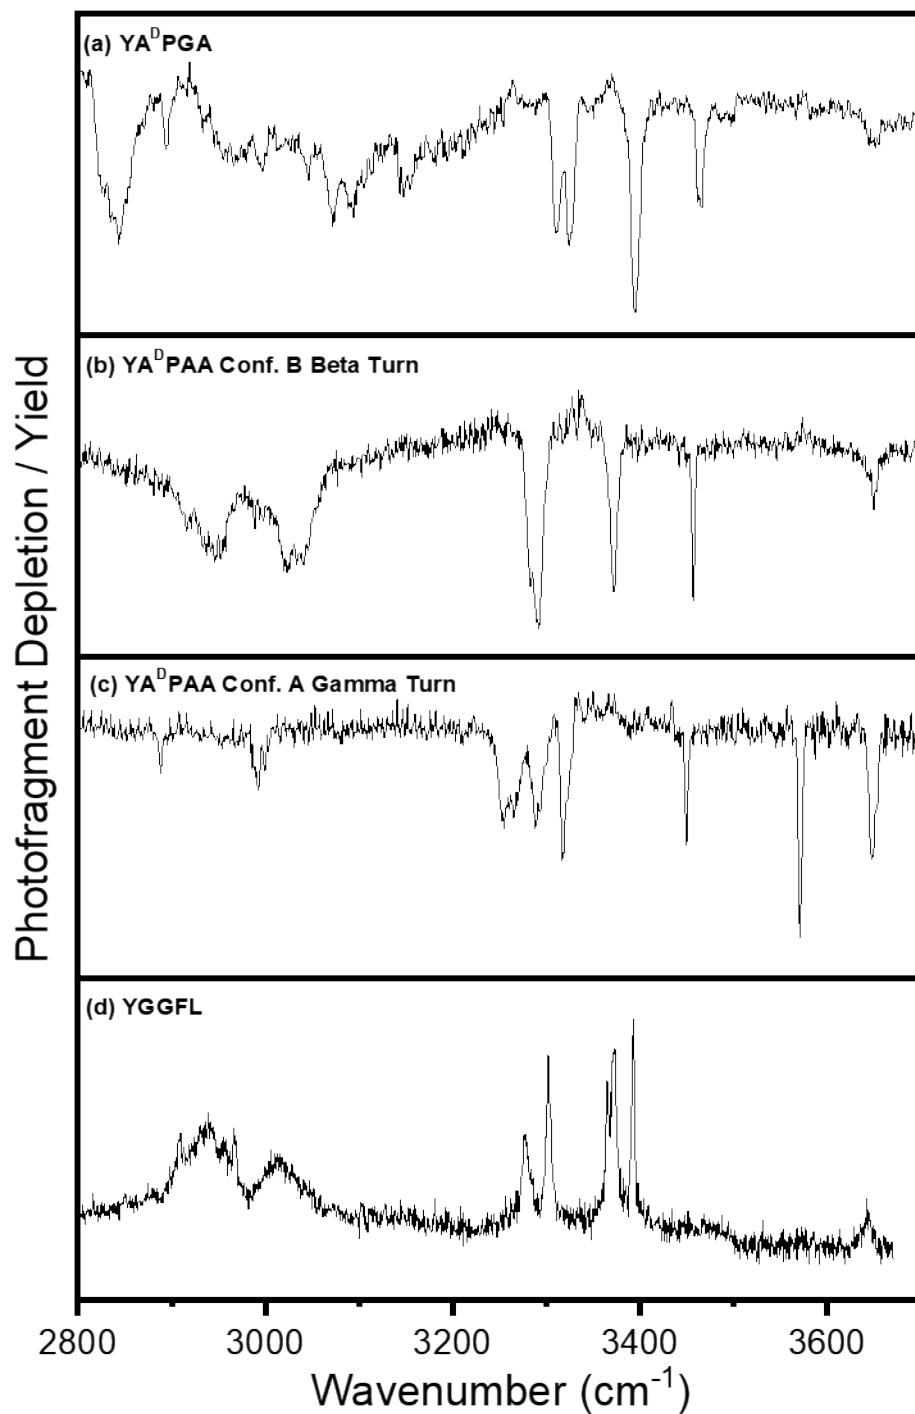

**Figure S3.** Comparison of the infrared spectra of various turn types.

Conformation specific infrared spectra of (a) the Type II  $\beta$ -turn found in  $\text{YA}^{\text{D}}\text{PGA}$ , (b) the Type II'  $\beta$ -turn found in Conformer B of  $\text{YA}^{\text{D}}\text{PAA}$  (c) the double  $\gamma$ -turn found in Conformer A of  $\text{YA}^{\text{D}}\text{PAA}$  and (d) the Type II'  $\beta$ -turn found in  $\text{YGGFL}$ . In all cases, the peptides are protonated at the N-terminus.

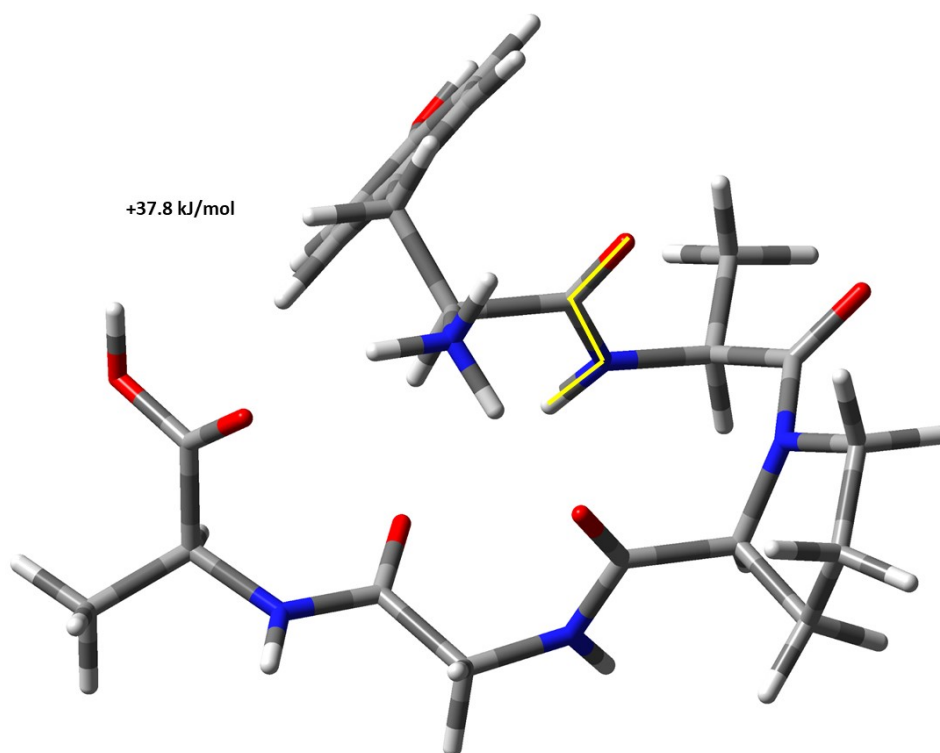

Figure S4.  $\text{YA}^{\text{LPGA}}$  conformer B with trans amide bond

Optimized calculated structure of conformer B of  $[\text{YA}^{\text{LPGA}} + \text{H}]^+$  with a trans amide bond (yellow lines) between  $\text{Y}_1$  and  $\text{A}_2$  instead of the cis amide bond in the assigned structure.

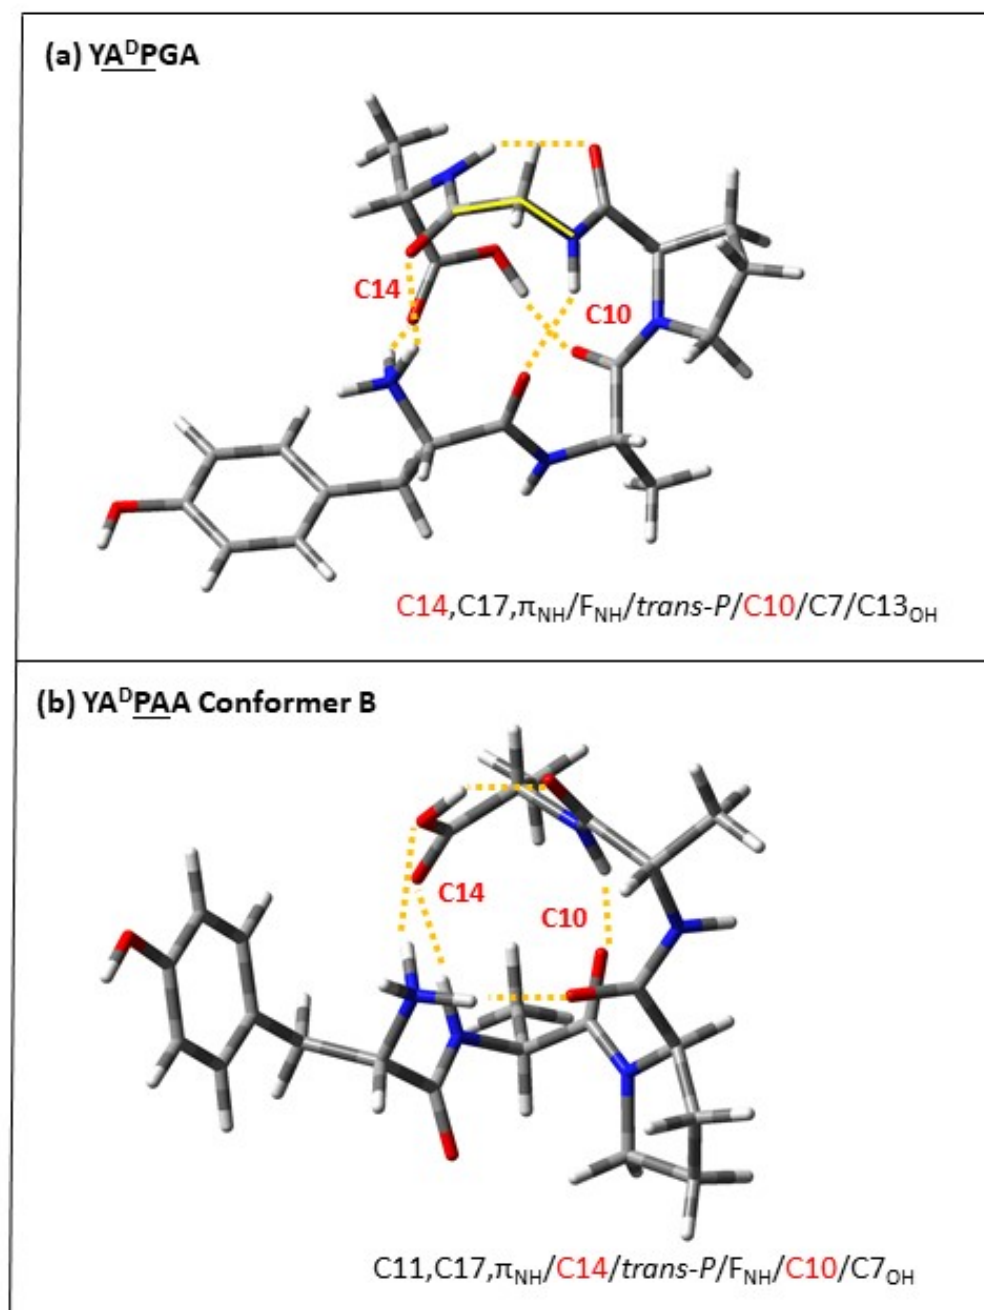

Figure S5. Comparison of the  $\beta$ -turns formed by (a) YA<sup>D</sup>PGA and (b) Conformer B of YA<sup>D</sup>PAA. The underlined region denotes the location of the turn. Short-hand notation describing the hydrogen bonding pattern of both molecules is shown with the  $\beta$ -turn forming hydrogen bonds labelled in red.
